# Supplementary material for: Intrahepatic CD69+Vδ1 T cells re-circulate in the blood of patients with metastatic colorectal cancer and limit tumor progression
Source: PubMed Central journal article supplement — J Immunother Cancer. 2022 Jul 21;10(7):e004579. doi: 10.1136/jitc-2022-004579 (PMC9310256; doi:10.1136/jitc-2022-004579), 2022-07-21
Supplement: jitc-2022-004579supp002.pdf [file jitc-2022-004579supp002.pdf]

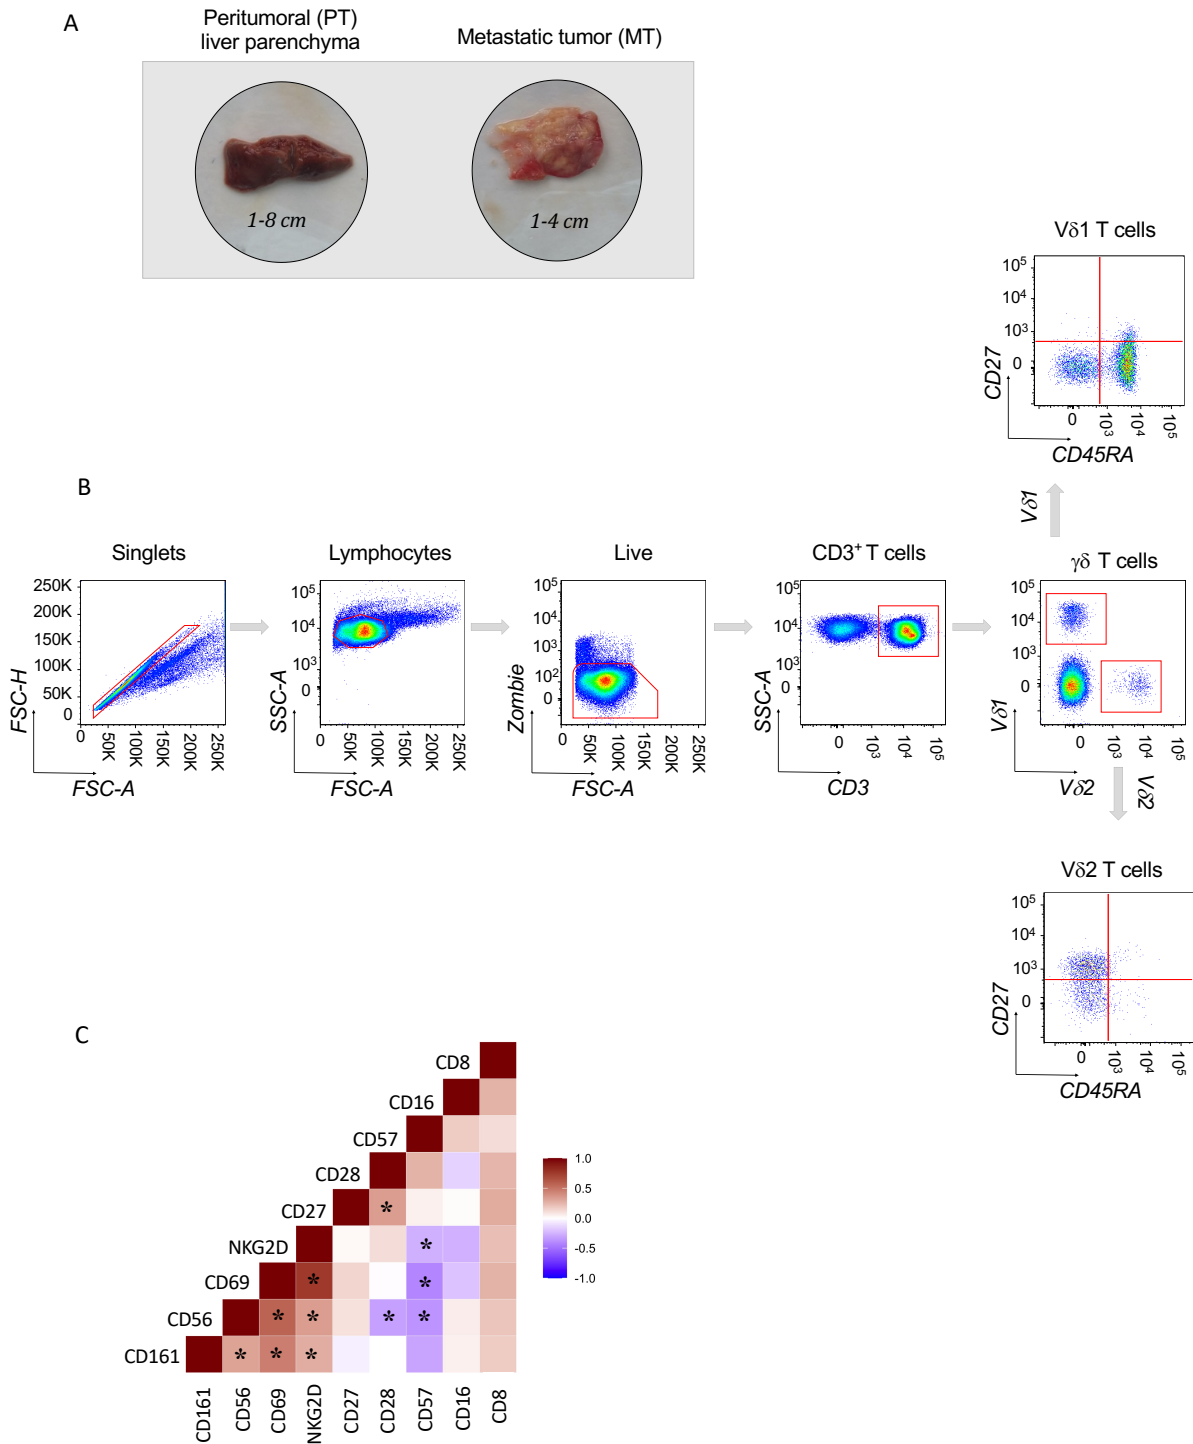

Bruni E. et al. - Supplemental Figure 1

**Supplemental Figure 1.****Peritumoral tissue (PT) and metastatic tumor (MT) areas CLM specimens and flow cytometry gating strategy.**

(A) Representative macroscopic examples (out of 93) of CLM liver specimen classified as peritumoral tissue (PT; left panel) or metastatic tumor (MT; right panel) parenchyma. **(B)** Representative (out of 93) flow cytometry pseudocolor plot graphs showing the gating strategy used to detect V $\delta$ 1 and V $\delta$ 2 T cell subsets among viable CD3<sup>+</sup> T lymphocytes and identification of differential phenotypes (T<sub>EMRA</sub>, T<sub>NAIVE</sub>, T<sub>CM</sub> and T<sub>EM</sub>) based on CD27 and CD45RA markers expression among V $\delta$ 1 and V $\delta$ 2 T cells from PB of a CLM patient (out of 93). **(C)** Heatmap of flow cytometry data showing Spearman's rank between the mean of different cell markers expression (%) in PT V $\delta$ 1 TILs from CLM patients ( $n=61$ ).

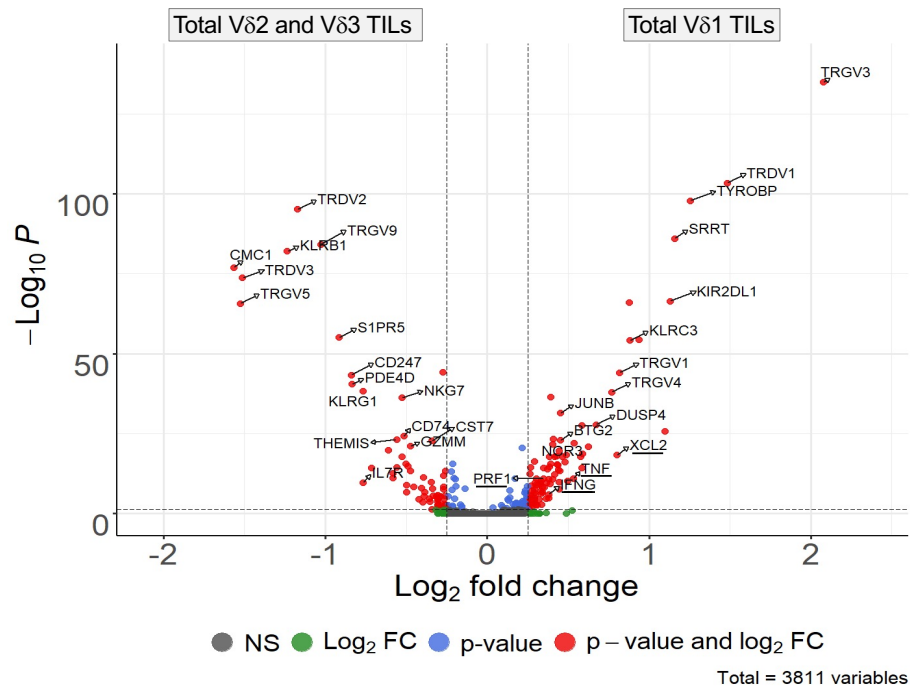

Bruni E. et al. - Supplemental Figure 2

**Supplemental Figure 2.****Analysis of differentially expressed genes between V $\delta$ 1 and V $\delta$ 2-3 TIL subsets from CLM.**

Volcano plot showing differentially expressed genes (DEGs) between total V $\delta$ 1 (cluster 0 and 3) versus total V $\delta$ 2 (cluster 2 and 5) and V $\delta$ 3 (cluster 1 and 6) TILs. Red circles represent genes with *adj. P value* < 0.05 and Log<sub>2</sub>-FoldChange differential expression > 0.25, blue circles genes with *adj. P value* < 0.05 and Log<sub>2</sub>-FoldChange < 0.25; green circles genes with *adj. P value* > 0.05 and Log<sub>2</sub>-FoldChange > 0.25 and grey ones represent genes with *adj. P value* > 0.05 and Log<sub>2</sub>-FoldChange < 0.25.



**Supplemental Figure 3.****scRNA-seq integrated analysis comparing differentially expressed genes of circulating and tumor infiltrating  $\gamma\delta$ T cells from CLM patients.**

(A) Violin plots showing the transcript levels of *TRGV* genes among the 6  $\gamma\delta$ T cell clusters identified by the integrated analyses of peripheral blood (PB) and peritumor (PT) samples from 3 CLM patients undergone surgical resections. (B-C) Volcano plots showing differently expressed genes (DEGs) between total PB and PT V $\delta$ 2 T cells (B), and V $\delta$ 1 T cells (C). Red circles represent genes with *adj. P value* <0.05 and *Log<sub>2</sub>-FoldChange differential expression* > 0.25, blue circles genes with *adj. P value* < 0.05 and *Log<sub>2</sub>-FoldChange* < 0.25; green circles genes with *adj. P value* >0.05 and *Log<sub>2</sub>-FoldChange* > 0.25 and grey ones represent genes with *adj. P value* >0.05 and *Log<sub>2</sub>-FoldChange* <0.25.

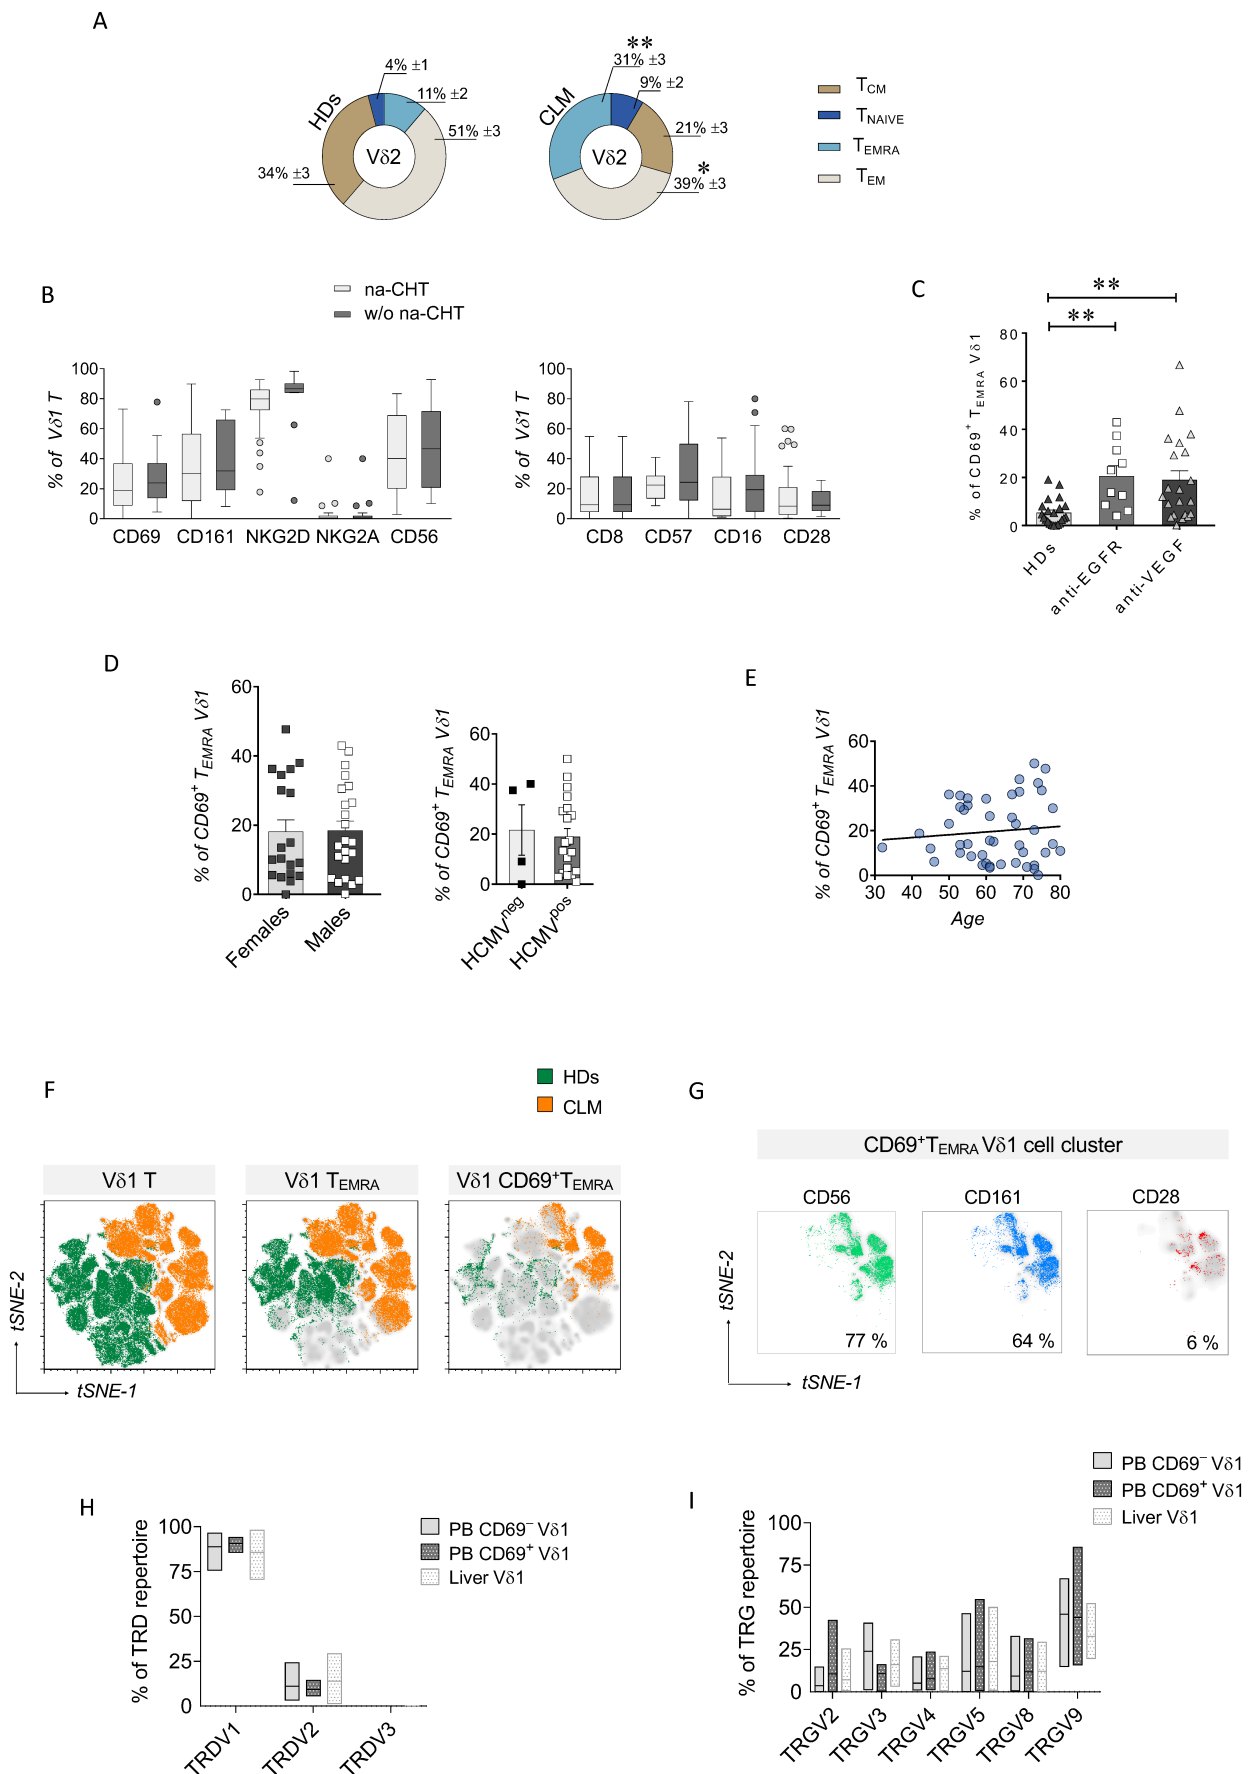

Bruni E. et al. - Supplemental Figure 4

**Supplemental Figure 4.****Frequencies, phenotype and TCR repertoires of PB V $\delta$ 1 and V $\delta$ 2 T cells from CLM patients.**

**(A)** Pie charts showing the mean frequency distribution (%) of PB T<sub>NAIVE</sub>, T<sub>CM</sub>, T<sub>EM</sub> and T<sub>EMRA</sub> V $\delta$ 2 T cells in healthy donors (HDs) ( $n=33$ ) and in CLM ( $n=50$ ). **(B)** Statistical bar graph showing the mean ( $\pm$ SEM) frequency (%) of several surface markers differentially expressed on PB V $\delta$ 1 T cells in CLM patients either in the absence ( $n=13$ ) (grey) or in the presence ( $n=40$ ) (white) of na-CHT. **(C)** Mean ( $\pm$ SEM) frequency (%) of CD69<sup>+</sup>T<sub>EMRA</sub> V $\delta$ 1 cell cluster in HDs and CLM patients underwent either anti-EGFR ( $n=10$ ) or anti-VEGF ( $n=20$ ) mAbs therapy. **(D)** Statistical bar graph showing the mean ( $\pm$ SEM) frequency (%) of PB CD69<sup>+</sup>T<sub>EMRA</sub> V $\delta$ 1 cells in CLM patients according to sex (Female,  $n=18$ ; Male,  $n=26$ ) (left panel) and HCMV infection status (HCMV<sup>neg</sup>,  $n=4$ ; HCMV<sup>pos</sup>,  $n=20$ ) (right panel). **(E)** Pearson's rank correlation between frequency (%) of PB CD69<sup>+</sup>T<sub>EMRA</sub> V $\delta$ 1 cells and age of CLM patients ( $n=49$ ). **(F-G)** *t*-distributed Stochastic Neighbor Embedding (*t*-SNE) plots showing projection of total V $\delta$ 1 T cells or either the specific T<sub>EMRA</sub> or CD69<sup>+</sup>T<sub>EMRA</sub> V $\delta$ 1 cells in HDs ( $n=22$ ; green) and CLM ( $n=22$ ; orange) **(F)**, and the overlapping of different cell surface markers in CLM CD69<sup>+</sup>T<sub>EMRA</sub> V $\delta$ 1 cells ( $n=22$ ) **(G)**. **(H-I)** TCR-repertoire analysis of the liver and PB V $\delta$ 1 T cells. Quantification (%) of V chains for TCR- $\delta$  (TRD) **(H)** and TCR- $\gamma$  (TRG) **(I)** repertoires of PB CD69<sup>+</sup> and CD69<sup>-</sup> V $\delta$ 1 and liver PT V $\delta$ 1 of CLM patients ( $n=5$ ).



Running title: Prognostic relevance of V $\delta$ 1 T cells in liver metastatic cancer E. Bruni et al.

**Supplemental Table 1|  
Monoclonal antibodies (mAbs) used for flow cytometry analysis.**

| <b>Marker</b>                | <b>Fluorochrome</b> | <b>Clone</b> | <b>Company</b>  | <b>Catalogue Number</b> |
|------------------------------|---------------------|--------------|-----------------|-------------------------|
| <b>CD3</b>                   | BUV661              | UCHT1        | BD              | 565065                  |
| <b>CD8</b>                   | BUV805              | SK1          | BD              | 564912                  |
| <b>CD16</b>                  | BUV496              | 348          | BD              | 564653                  |
| <b>CD16</b>                  | PR-CY7              | 3G8          | BD              | 557744                  |
| <b>CD45</b>                  | AF700               | HI30         | BD              | 560566                  |
| <b>CD45RA</b>                | BUV737              | HI100        | BD              | 564442                  |
| <b>CD56</b>                  | BUV563              | NCAM16.2     | BD              | 565704                  |
| <b>CD56</b>                  | PE-CF594            | B159         | BD              | 562289                  |
| <b>CD107a</b>                | PE                  | H4A3         | BD              | 555801                  |
| <b>CCR7</b>                  | AF700               | 150503       | BD              | 561143                  |
| <b>CXCR3</b>                 | APC                 | 1C6          | BD              | 550967                  |
| <b>NKG2D</b>                 | BV780               | 1D11         | BD              | 743560                  |
| <b>V<math>\delta</math>2</b> | BUV395              | B6           | BD              | 743754                  |
| <b>V<math>\delta</math>2</b> | FITC                | IMMU 389     | Beckman Coulter | IM1464                  |
| <b>CD3</b>                   | BV650               | OKT3         | BioLegend       | 317324                  |
| <b>CD28</b>                  | PE-CY7              | CD28.2       | BioLegend       | 302926                  |
| <b>CD69</b>                  | BV605               | FN50         | BioLegend       | 310938                  |
| <b>CD161</b>                 | BV421               | HP-3G10      | BioLegend       | 339914                  |
| <b>CD14</b>                  | BV570               | M5E2         | BioLegend       | 301832                  |
| <b>CD27</b>                  | APC eFluor780       | 0323         | eBioscience     | 47027942                |
| <b>CD45</b>                  | APC-Vio770          | 5B1          | Miltenyi        | 130096609               |
| <b>CD57</b>                  | PE-Vio615           | REA769       | Miltenyi        | 130111815               |
| <b>V<math>\delta</math>1</b> | PE                  | REA173       | Miltenyi        | 130120440               |
| <b>V<math>\delta</math>1</b> | PE-Vio770           | REA173       | Miltenyi        | 130117697               |
| <b>CD19</b>                  | APC-Vio770          | REA675       | Miltenyi        | 130113643               |
